# Supplementary material for: Efficient multi-barrier thin film encapsulation of OLED using alternating Al2O3 and polymer layers
Source: Royal Society of Chemistry journal article supplement (doi:10.1039/c8ra00023a), 2018-01-01
Supplement: c8ra00023a1.pdf [file c8ra00023a1.pdf]

## Efficient Multi-Barrier Thin Film Encapsulation of OLED Using Alternating Al<sub>2</sub>O<sub>3</sub> and Polymer Layers

Jie Wu<sup>a,b,†</sup>, Fei Fei<sup>a,†</sup>, Changting Wei<sup>a,c</sup>, Xiaolian Chen<sup>a</sup>, Shuhong Nie<sup>a</sup>, Dongyu Zhang<sup>a</sup>, Wenming Su<sup>a,\*</sup>,  
and Zheng Cui<sup>a,\*</sup>

<sup>a</sup>. *Printable Electronics Research Center, Suzhou Institute of Nano-Tech and Nano-Bionics, Chinese Academy of Sciences, 398 Ruoshui Road, Suzhou Industrial Park, Suzhou, Jiangsu, 215123, People's Republic of China. Email: wmsu2008@sinano.ac.cn; zcui2009@sinano.ac.cn.*

<sup>b</sup>. *University of Chinese Academy of Sciences, No. 19 Yuquan Road, Beijing 100049, People's Republic of China.*

<sup>c</sup>. *MIIT Key Laboratory of Advanced Display Materials and Devices, Institute of Optoelectronics & Nanomaterials, School of Materials Science and Engineering, Nanjing University of Science and Technology, Nanjing 210094, People's Republic of China.*

<sup>†</sup>These authors contributed equally.

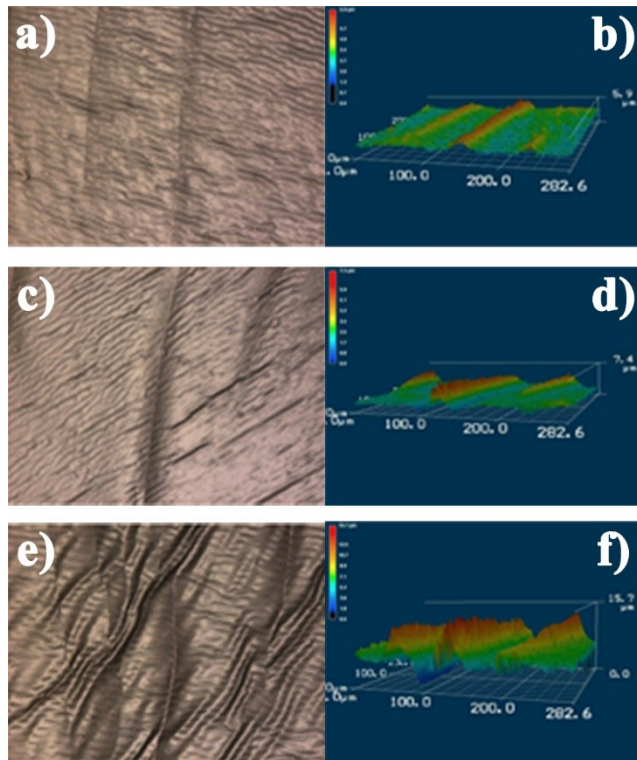

**Fig. S1** Surface morphological characteristics of confocal laser scanning microscope with different structure of Al<sub>2</sub>O<sub>3</sub>/ parylene C (a) - and (b)-after repeatedly stretching of 15 nm Al<sub>2</sub>O<sub>3</sub>/250 nm parylene C, (c)- and (d)-after repeatedly stretching of 30 nm Al<sub>2</sub>O<sub>3</sub>/500 nm parylene C, (e)- and (f)-after repeatedly stretching of 50 nm Al<sub>2</sub>O<sub>3</sub>/500 nm parylene C.
